# Supplementary material for: Orbital-overlap-driven hybridization in 3d-transition metal perovskite oxides LaMO3 (M = Ti-Ni) and La2CuO4
Source: Springer Nature journal article supplement (doi:10.1038/s42005-024-01642-5), 2024-05-14
Supplement: MOESM1 [file 42005_2024_1642_MOESM1_ESM.pdf]

## Supplementary information

# Orbital-overlap-driven hybridization in 3d-transition metal perovskite oxides $\text{LaMO}_3$ ( $M = \text{Ti-Ni}$ ) and $\text{La}_2\text{CuO}_4$

Chun-Yu Liu,<sup>1,2,\*</sup> Lorenzo Celiberti,<sup>3</sup> Régis Decker,<sup>1</sup> Kari Ruotsalainen,<sup>1</sup> Katarzyna Siewierska,<sup>1</sup> Maximilian Kusch,<sup>1</sup> Ru-Pan Wang,<sup>4</sup> Dong Jik Kim,<sup>5</sup> Israel Ibukun Olaniyan,<sup>5,6</sup> Daniele Di Castro,<sup>7,8</sup> Keisuke Tomiyasu,<sup>9, 10</sup> Emma van der Minne,<sup>11</sup> Yorick A. Birkhölzer,<sup>11</sup> Ellen M. Kiens,<sup>11</sup> Iris C. G. van den Bosch,<sup>11</sup> Komal N. Patil,<sup>12</sup> Christoph Baeumer,<sup>11</sup> Gertjan Koster,<sup>11</sup> Masoud Lazemi,<sup>12</sup> Frank M. F. de Groot,<sup>12</sup> Catherine Dubourdieu,<sup>5,6</sup> Cesare Franchini,<sup>3,13</sup> and Alexander Föhlisch<sup>1, 2, †</sup>

<sup>1</sup>Institute for Methods and Instrumentation for Synchrotron Radiation Research, Helmholtz-Zentrum Berlin für Materialien und Energie GmbH, 12489 Berlin, Germany

<sup>2</sup>Institut für Physik und Astronomie, Universität Potsdam, 14476 Potsdam, Germany

<sup>3</sup>University of Vienna, Faculty of Physics and Center for Computational Materials Science, Vienna, Austria

<sup>4</sup>Institute for Nanostructure and Solid State Physics, Hamburg University, 22761 Hamburg, Germany

<sup>5</sup>Institute Functional Oxides for Energy-Efficient IT, Helmholtz-Zentrum Berlin für Materialien und Energie GmbH, 14109 Berlin, Germany

<sup>6</sup>Freie Universität Berlin, Physical Chemistry, 14195 Berlin, Germany

<sup>7</sup>Dipartimento di Ingegneria Civile e Ingegneria Informatica, Università di Roma Tor Vergata, Via del Politecnico 1, I-00133 Roma, Italy

<sup>8</sup>CNR-SPIN, Università di Roma Tor Vergata, Via del Politecnico 1, I-00133 Roma, Italy

<sup>9</sup>Department of Physics, Tohoku University, Sendai 980-8578, Japan

<sup>10</sup>Nissan ARC Limited, Natsushima-cho 1, Yokosuka 237-0061, Japan

<sup>11</sup>MESA+ Institute for Nanotechnology, University of Twente, Faculty of Science and Technology, 26 P.O. Box 217, 7500 AE Enschede, The Netherlands

<sup>12</sup>Materials Chemistry and Catalysis, Debye Institute for Nanomaterials Science, Utrecht University, Universiteitsweg 99, 3584 CG, Utrecht, The Netherlands

<sup>13</sup>Department of Physics and Astronomy 'Augusto Righi', Alma Mater Studiorum - Università di Bologna, Bologna, 40127 Italy

\* chun-yu.liu@helmholtz-berlin.de

† alexander.foehlisch@helmholtz-berlin.de

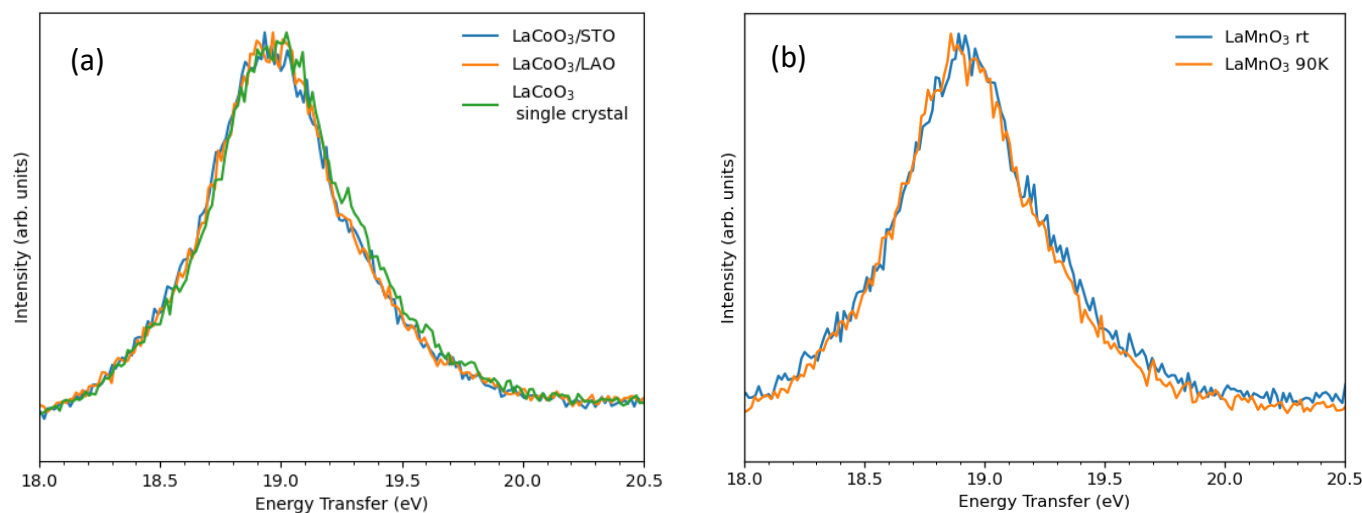

**Fig. S1. Strain and temperature effects on the  $\text{La } 3\text{D}_1$  state observed with resonant inelastic X-ray scattering (RIXS).** (a) RIXS spectra of  $\text{LaCoO}_3$  single crystal and thin films on different substrates. STO =  $\text{SrTiO}_3$  substrate (tensile strain), LAO =  $\text{LaAlO}_3$  substrate (compressive strain). (b) RIXS spectra of  $\text{LaMnO}_3$  at two temperatures. rt = room temperature.

Table S1. **Fitted result of all compounds.** The model fit is composed of two Voigt profiles representing RIXS  ${}^3D_1$  and  ${}^3D_2$  atomic terms. The gamma ( $\gamma$ , Lorentzian parameter) is fixed to the values from  $\text{LaAlO}_3$  ( $\gamma_{D1} = 0.103$  eV,  $\gamma_{D2} = 0.169$  eV). The Gaussian parameters  $\sigma_{D1}$  and  $\sigma_{D2}$ , representing combined chemical broadening factors, are coupled. The energy separation of the two peaks is fixed to 0.212 eV. The two-Voigt peaks' intensity ratio is fixed to 1. The rest parameters are set free. The standard errors are evaluated based on best model fit with least-squares method.

| Sample                    | ${}^3D_1$ center (eV) | $\sigma_{D1}$ (eV) | ${}^3D_2$ center (eV) | $\sigma_{D2}$ (eV) |
|---------------------------|-----------------------|--------------------|-----------------------|--------------------|
| $\text{LaTiO}_3$          | 18.798±0.003          | 0.268±0.004        | 19.010±0.003          | 0.268±0.004        |
| $\text{LaVO}_3$           | 18.818±0.002          | 0.195±0.004        | 19.030±0.002          | 0.195±0.004        |
| $\text{LaCrO}_3$          | 18.820±0.003          | 0.175±0.004        | 19.032±0.003          | 0.175±0.004        |
| $\text{LaMnO}_3$          | 18.835±0.003          | 0.208±0.004        | 19.047±0.003          | 0.208±0.004        |
| $\text{LaFeO}_3$          | 18.855±0.002          | 0.215±0.004        | 19.067±0.002          | 0.215±0.004        |
| $\text{LaCoO}_3$          | 18.876±0.002          | 0.199±0.003        | 19.088±0.002          | 0.199±0.003        |
| $\text{LaNiO}_3$          | 18.813±0.003          | 0.239±0.004        | 19.025±0.003          | 0.239±0.004        |
| $\text{La}_2\text{CuO}_4$ | 18.716±0.002          | 0.239±0.003        | 18.928±0.002          | 0.239±0.003        |
| $\text{LaAlO}_3$          | 18.956±0.001          | 0.027±0.003        | 19.168±0.001          | 0.027±0.003        |
